# Supplementary material for: Convergence criteria for single-step free-energy calculations: the relation between the Π bias measure and the sample variance
Source: Royal Society of Chemistry journal article supplement (doi:10.1039/d4sc00140k), 2024-01-01
Supplement: d4sc00140k1.pdf [file d4sc00140k1.pdf]

# Supplementary Information

## Convergence Criteria for Single-step Free-energy Calculations: The Relation between the $\Pi$ Bias Measure and the Sample Variance

Meiting Wang<sup>†, ‡</sup>, Ye Mei<sup>\*, ¶, §, ||</sup>, and Ulf Ryde<sup>\*, ‡</sup>

<sup>†</sup>School of Medical Engineering & Henan International Joint Laboratory of Neural Information Analysis and Drug Intelligent Design, Xinxiang Medical University, Xinxiang 453003, China

<sup>‡</sup>Department of Computational Chemistry, Lund University, Chemical Centre, P.O. Box 124, SE-221 00 Lund, Sweden

<sup>¶</sup>State Key Laboratory of Precision Spectroscopy, School of Physics and Electronic Science, East China Normal University, Shanghai 200241, China

<sup>§</sup>NYU-ECNU Center for Computational Chemistry at NYU Shanghai, Shanghai 200062, China

<sup>||</sup>Collaborative Innovation Center of Extreme Optics, Shanxi University, Taiyuan, Shanxi 030006, China

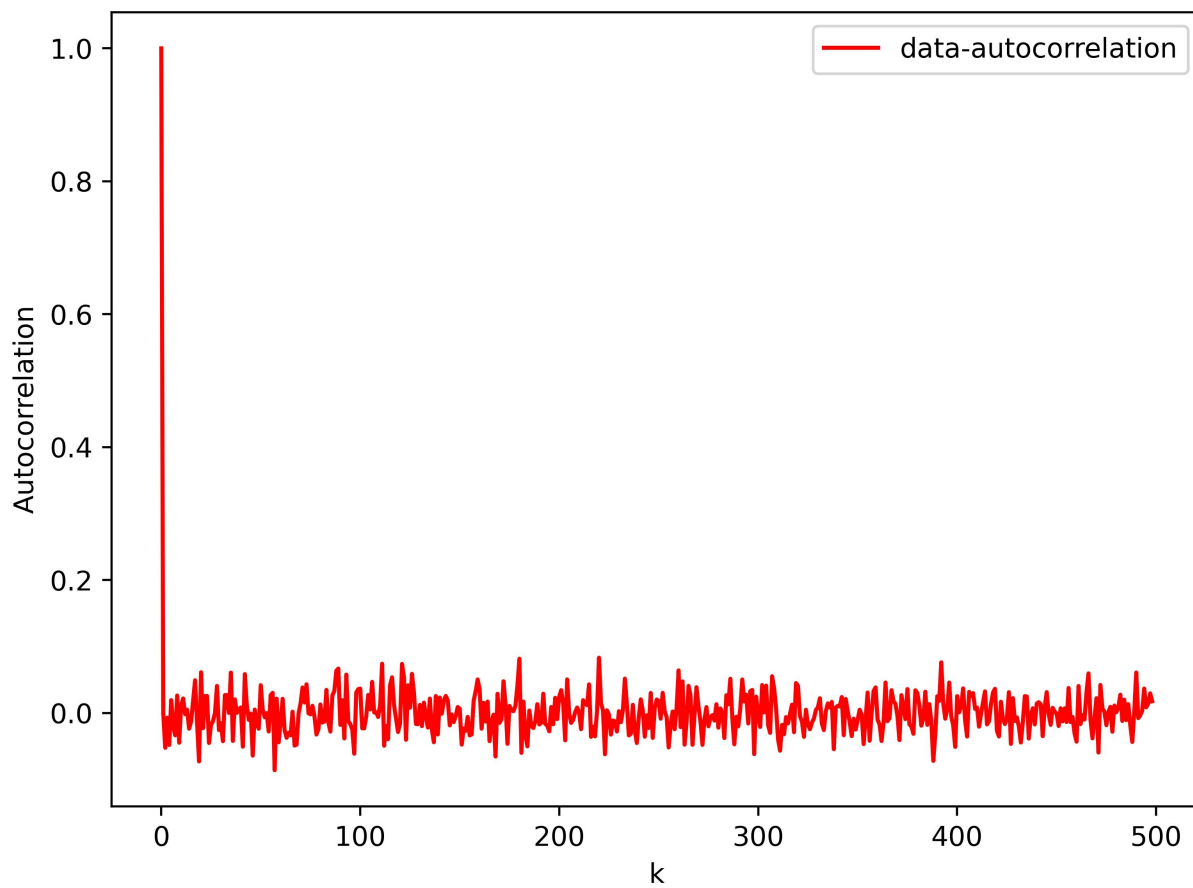

Figure S1: Autocorrelation of random numbers.

Table S1: The minimum sampling size required to reach  $\Pi \geq 0.5$  for different values of  $\sigma_{\Delta U}$ , assuming a Gaussian distribution.

| $\sigma_{\Delta U}$ | $N_{min}$ |
|---------------------|-----------|
| 0.50                | 10        |
| 0.75                | 22        |
| 1.00                | 60        |
| 1.25                | 192       |
| 1.50                | 719       |
| 1.75                | 3166      |
| 2.00                | 16398     |
| 2.25                | 100118    |
| 2.50                | 721964    |
| 2.75                | 6158734   |
| 3.00                | 62227738  |

Table S2: Average values of  $\Pi$ ,  $w_{max}$ , and  $\Delta\Delta G_{CA}$  for simulations of Gaussian distributions with a varying  $\sigma_{\Delta U}$  and 200 samples. 100 simulations were performed to obtain uncertainties of all values, presented as standard deviations over these simulations (thus, the standard errors are 10 times smaller).

| $\sigma_{\Delta U}$ | $\Pi_{Av}$ | $w_{max}$ | $\Delta\Delta G_{CA}$ |
|---------------------|------------|-----------|-----------------------|
| 0.50                | 1.78±0.00  | 0.04±0.00 | 0.00±0.00             |
| 0.75                | 1.36±0.00  | 0.08±0.00 | 0.00±0.00             |
| 1.00                | 0.96±0.00  | 0.14±0.00 | 0.01±0.00             |
| 1.25                | 0.57±0.00  | 0.22±0.00 | 0.05±0.01             |

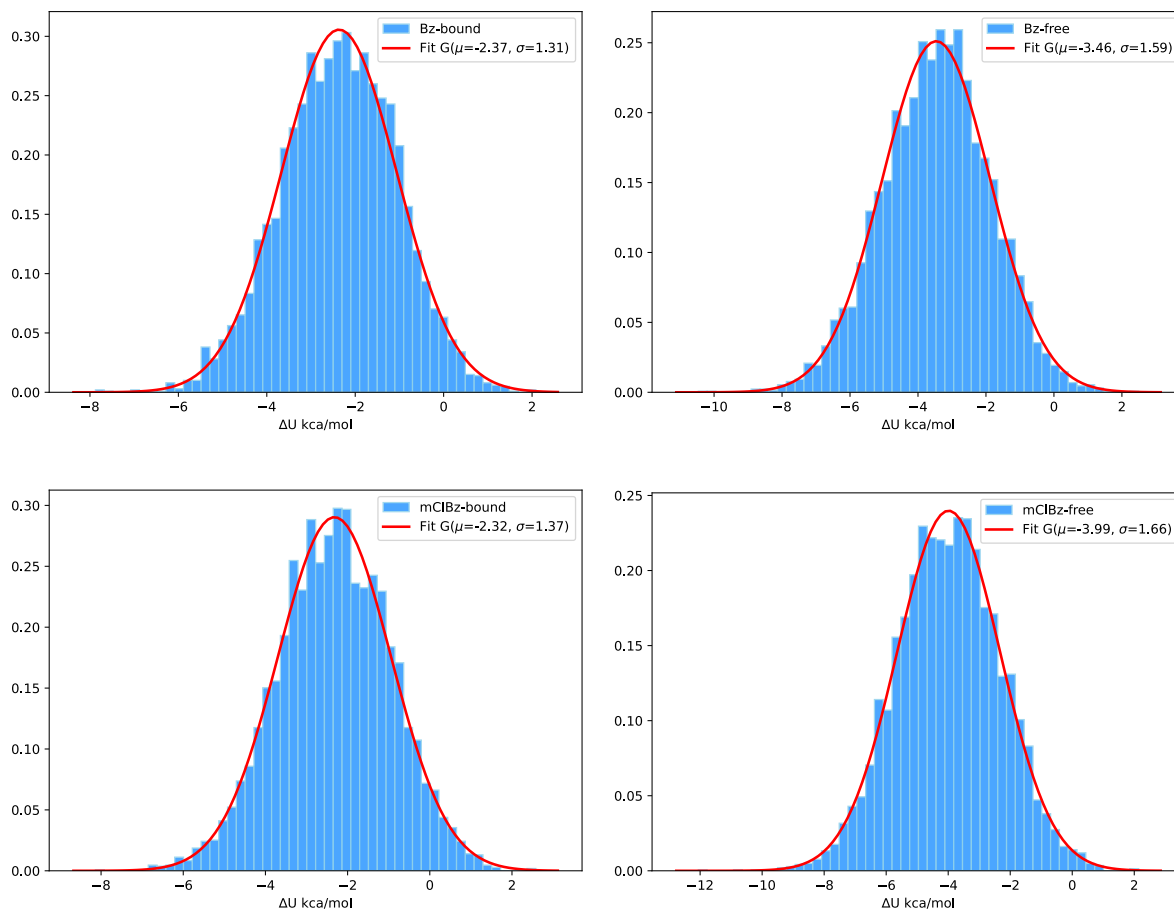

Figure S2: Distributions of  $\Delta U$  for Bz and mClBz when bound or not bound to the octa-acid deep-cavity host, together with Gaussian fits.
